# Supplementary material for: Impact of co-payment level increase of antidiabetic medications on glycaemic control: an interrupted time-series study among Finnish patients with type 2 diabetes
Source: PubMed Central journal article supplement (PMC7694920; doi:10.1186/s12913-020-05952-6), 2020-11-27
Supplement: 12913_2020_5952_MOESM1_ESM.pdf [file 12913_2020_5952_MOESM1_ESM.pdf]

**Additional file 1.** Characteristics of type 2 diabetes patients at the time of the co-payment increase on Jan 1, 2017 as frequencies (proportions) unless otherwise stated.

|                                               | T2D patients alive on Jan 1, 2017 (n=8436) | HbA1c measurements during the follow-up (n=8143) | No HbA1c measurement during the follow-up (n=293) | SMD (%) |
|-----------------------------------------------|--------------------------------------------|--------------------------------------------------|---------------------------------------------------|---------|
| Mean age, yrs (SD)                            | 69.9 (11.5)                                | 68.1 (11.3)                                      | 64.8 (15.2)                                       | 39.5    |
| <75 years old                                 | 5424 (64.3)                                | 5203 (63.9)                                      | 221 (75.4)                                        | 25.3    |
| ≥75 years old                                 | 3012 (35.7)                                | 2940 (36.1)                                      | 72 (24.6)                                         | 25.3    |
| Female                                        | 3958 (46.9)                                | 3828 (47.0)                                      | 130 (44.4)                                        | 5.3     |
| Mean time since T2D diagnosis, yrs (SD)       | 11.4 (6.1)                                 | 11.5 (6.1)                                       | 8.9 (5.0)                                         | 45.6    |
| Duration of T2D                               |                                            |                                                  |                                                   |         |
| <10 years                                     | 4441 (52.6)                                | 4243 (52.1)                                      | 198 (67.6)                                        | 32.0    |
| 10-15 years                                   | 2037 (24.2)                                | 1976 (24.3)                                      | 61 (20.8)                                         | 8.3     |
| >15 years                                     | 1958 (23.2)                                | 1924 (23.6)                                      | 34 (11.6)                                         | 32.0    |
| Good glycaemic control (<53 mmol/mol) in 2016 | 5929 (70.3)                                | 5636 (69.2)                                      | NA                                                |         |
| T2D + concordant diseases only                | 2913 (34.5)                                | 2880 (35.4)                                      | 33 (11.3)                                         | 59.5    |
| T2D + discordant diseases only                | 812 (9.6)                                  | 787 (9.7)                                        | 25 (8.5)                                          | 3.9     |
| T2D + both concordant and discordant diseases | 2048 (24.3)                                | 2005 (24.6)                                      | 43 (14.7)                                         | 25.2    |
| T2D without concordant or discordant diseases | 2663 (31.6)                                | 2471 (30.3)                                      | 192 (65.5)                                        | 75.2    |
| Died during the follow-up                     | 497 (5.9)                                  | 474 (5.8)                                        | 23 (7.9)                                          | 8.3     |

Abbreviations: SMD, standardized mean difference; T2D, type 2 diabetes.

<sup>†</sup>Concordant diseases: hypertension, coronary heart disease, atrial fibrillation, heart failure, peripheral arterial diseases, stroke (incl. SAH), chronic kidney disease, neuropathies, blindness, or diabetes complications (E11.2-E11.8 sublevels).

<sup>‡</sup>Discordant diseases: cancers, asthma, gout, glaucoma, depression, dementia, mental diseases, rheumatoid and other arthritis, osteoporosis, neuromuscular diseases, or liver diseases excl. cancers.
