# Supplementary material for: Impact of co-payment level increase of antidiabetic medications on glycaemic control: an interrupted time-series study among Finnish patients with type 2 diabetes
Source: PubMed Central journal article supplement (PMC7694920; doi:10.1186/s12913-020-05952-6), 2020-11-27
Supplement: 12913_2020_5952_MOESM2_ESM.pdf [file 12913_2020_5952_MOESM2_ESM.pdf]

**Additional file 2.** Number of purchases and total DDDs by ATC subgroups in 2016 and 2017 among type 2 diabetes patients who survived until Jan 1, 2018 (n=8025).

|                                                           | 2016      |           | 2017      |           |
|-----------------------------------------------------------|-----------|-----------|-----------|-----------|
|                                                           | Purchases | DDD       | Purchases | DDD       |
| Insulin (A10A)                                            | 11,300    | 1,347,694 | 12,184    | 1,342,181 |
| Metformin (A10BA02)                                       | 21,866    | 1,592,232 | 22,164    | 1,499,515 |
| Sulfonylureas (A10BB)                                     | 729       | 67,225    | 541       | 50,347    |
| Combinations of oral blood glucose lowering drugs (A10BD) | 2451      | 195,500   | 2722      | 192,115   |
| Glitazones (A10BG)                                        | 358       | 24,541    | 255       | 19,177    |
| DPP-4 inhibitors (A10BH, gliptins)                        | 11,484    | 740,239   | 12,689    | 706,970   |
| GLP-1 analogues (A10BJ)                                   | 1414      | 121,361   | 1669      | 114,285   |
| SGLT2 inhibitors (A10BK)                                  | 2299      | 144,018   | 4407      | 245,228   |
| Glinides (A10BX02)                                        | 149       | 8221      | 133       | 7864      |

Abbreviations: ATC, Anatomical Therapeutic Chemical; DDD, defined daily dose.
